# Supplementary material for: Polymeric Encapsulate of Streptomyces Mycelium Resistant to Dehydration with Air Flow at Room Temperature
Source: MDPI journal article supplement (doi:10.3390/polym15010207), 2022-12-31
Supplement: s1 [file s1]

## Supplementary Tables and Figures

**Table S1.** Formulations of *Streptomyces* strains

| Strain                              | Encapsulated biomass                                 | Formulation                                                                                                              | Supplements                                                                                       | CFU mL <sup>-1</sup> (or g <sup>-1</sup> ) before/after encapsulation                                                                                                                                                                                                                 | shelf-life                       | Storage at | Ref. |
|-------------------------------------|------------------------------------------------------|--------------------------------------------------------------------------------------------------------------------------|---------------------------------------------------------------------------------------------------|---------------------------------------------------------------------------------------------------------------------------------------------------------------------------------------------------------------------------------------------------------------------------------------|----------------------------------|------------|------|
| <i>Streptomyces</i> sp. T-741       | spores                                               | Lyophilization and freezing in liquid nitrogen                                                                           | sucrose (10 %), skimmed milk (5.5 %) and gelatin (1.5 %)                                          | 80-90%                                                                                                                                                                                                                                                                                | 8 years                          | 4°C        | [21] |
| <i>Streptomyces rochei</i>          | spores                                               | wettable talcum powder, sodium alginate pellets and sodium alginate-clay pellets *. Calcium alginate capsules were dried | 1.5 g of calcium carbonate and 10 g of carboxymethyl cellulose                                    | 2.1×10 <sup>5</sup> CFU g <sup>-1</sup> to 1.9×10 <sup>5</sup> CFU g <sup>-1</sup> /2×10 <sup>6</sup> CFU g <sup>-1</sup> to 1.7×10 <sup>6</sup> CFU g <sup>-1</sup> ; 2×10 <sup>6</sup> CFU mL <sup>-1</sup> to 3.7×10 <sup>5</sup> CFU g <sup>-1</sup> (after drying 92%; 91%; 89%) |                                  |            | [27] |
| <i>Streptomyces cameroonensis</i>   | sporal solution                                      | Talcum powder and cassava starch (a 0.8 mm sieve)                                                                        | 15 g calcium carbonate and 10 g methyl cellulose                                                  | 10 <sup>9</sup> CFU/ml (400 mL); 1.07×10 <sup>6</sup> CFU g <sup>-1</sup>                                                                                                                                                                                                             | 6 months                         | 4°C        | [16] |
|                                     |                                                      |                                                                                                                          |                                                                                                   |                                                                                                                                                                                                                                                                                       |                                  |            |      |
| <i>Streptomyces</i> sp. Di-944      | lyophilized fragments of viable vegetative filaments | Alginate beads, durum flour (starch) granules, and talcum powder formulation                                             |                                                                                                   | (6.9×10 <sup>4</sup> and 7.3×10 <sup>2</sup> viable propagules/g) 2×10 <sup>7</sup> CFU g <sup>-1</sup> ; 1.2×10 <sup>5</sup> CFU g <sup>-1</sup> ; 7×10 <sup>3</sup> CFU g <sup>-1</sup>                                                                                             | (12-24 weeks) 14-10 weeks (good) | 4°C        | [44] |
| <i>Streptomyces griseus</i>         | vegetative cells                                     | sodium alginate/ kaolin clay/ alginate-kaolin combination                                                                |                                                                                                   | 10 <sup>6</sup> CFU g <sup>-1</sup> soil/ 10 <sup>6.12</sup> / 10 <sup>6.16</sup> CFU g <sup>-1</sup>                                                                                                                                                                                 |                                  |            | [13] |
| <i>Actinobacterias</i>              | vegetative cells                                     | cryopreservation and dry-freezing; clay, silica and sand                                                                 | cryoprotectants, glycerol at 20% and 30% (v/v) to freeze and 18% skim milk (w/v) for dry-freezing | 10 <sup>8</sup> cells mL <sup>-1</sup> (glycerol at 30% was the best)                                                                                                                                                                                                                 | 1 year                           | 4°C        | [18] |
| <i>Streptomyces fradiae</i> NKZ-259 | Vegetative cells                                     | wettable starch-kaolin powder                                                                                            |                                                                                                   | (5.4×10 <sup>6</sup> CFU/mL) 73.74 %                                                                                                                                                                                                                                                  | 4 months                         | 4°C        | [15] |

\*Texts were marked in color to relate data by line.

**Table S2.** Encapsulated and dehydrated formulations of bacteria with application in soil fertilization.

| Drying method                                                     | Formulation                         | Drying time (h)           | Microorganisms used                                       | Wet beads diameter | CFU g <sup>-1</sup> Initial(wet)/final (dry)                    | Ref. |
|-------------------------------------------------------------------|-------------------------------------|---------------------------|-----------------------------------------------------------|--------------------|-----------------------------------------------------------------|------|
| Dry air at 38°C                                                   | Alginate beads                      | 48 h/(10g beads)          | <i>Azospirillum brasilense</i> Cd (ATCC 29710)            | 100 - 200 µm       | 2x10 <sup>11</sup> /3x10 <sup>9</sup>                           | [22] |
| Laminar flow hood at 25°C                                         | Alginate beads                      | 20 h)/50g beads           | Cells of <i>Pseudomonas fluorescens</i>                   | 1mm                | 4.5x10 <sup>11</sup> /4.7x10 <sup>8</sup>                       | [23] |
| Dried in an oven at 35°C                                          | Alginate and starch                 | 24 h                      | <i>Azospirillum brasilense</i> Sp245                      | 2.3 mm             | 2.8x10 <sup>10</sup> /6.5x10 <sup>6</sup>                       | [24] |
| Drying chamber (desiccator) 23°C                                  | Alginate and protective ingredients | 72 h,                     | <i>Lactobacillus rhamnosus</i> R0011                      | 2.5 mm             | 1x10 <sup>8</sup> /2.5% or 56% with maltodextrin and y glycerol | [25] |
| Spray-dried inlet air temperature 130°C; outlet temperature 49°C. | Algnate powder                      |                           | Methylobacterium radiotolerans                            | powder             | 1x10 <sup>11</sup> /1x10 <sup>10</sup>                          | [26] |
| Laminar flow hood                                                 | Sodium alginate pellets             | Overnight                 | Spores of the strain PTL2 ( <i>S. rochei</i> NBRC 12908T) | 3mm                | 2x10 <sup>6</sup> /4.5x10 <sup>5</sup>                          | [27] |
| Dried at room temperature                                         | Microcapsuled                       | to obtain constant weight | <i>Klebsiella oxytoca</i> Rs-5                            | 1.10 mm            | 10 <sup>14</sup> /10 <sup>10</sup>                              | [28] |
| Oven maintained at 40°C                                           | Alginate-starch-bentonite           | 48 h                      | <i>Raoultella planticola</i> Rs-2                         | 2.2- 3.6mm         | 9.11x10 <sup>12</sup> /5.9x10 <sup>6</sup>                      | [29] |
| Circulating air oven at 40°C                                      | Starch–alginate beads (10:1.5 %w/v) | 12 hours                  | <i>Aspergillus flavus</i> spores                          | 1.95mm             | 7.5 log/4.5 log                                                 | [30] |

\* References included at the end of this document.

**Table S3.** Characteristics of drying methods most frequently applied during formulation development of bacteria inoculants [14].

|                           | Freeze drying                      | Spray drying                    | Fluidized bed-drying                                           | Vacuum-drying                      | Air-drying                         |
|---------------------------|------------------------------------|---------------------------------|----------------------------------------------------------------|------------------------------------|------------------------------------|
| Minimum sample size       | µL - mL                            | < 100 mL                        | < 100 mL                                                       | µL - mL                            | µL - mL                            |
| Typical temperature range | < 0°C                              | inlet 100-200°C; outlet 60-85°C | 30-35°C                                                        | 40-70°C                            | 25-35°C                            |
| Matrix compatibility      | No limitations                     | Liquid matrix                   | Liquid matrix sprayed onto carriers; pre-dried granular matrix | No limitations                     | No limitations                     |
| Out form                  | Cake – further processing required | Small sized particles           | Medium sized, particles, granules                              | Cake – further processing required | Cake – further processing required |
| Typical drying time       | Hours-days                         | Seconds-minutes                 | Minutes-hours                                                  | Hours-days                         | Hours-days                         |
| Operation                 | Straight forward                   | Challenging                     | Challenging                                                    | Straight forward                   | Challenging                        |

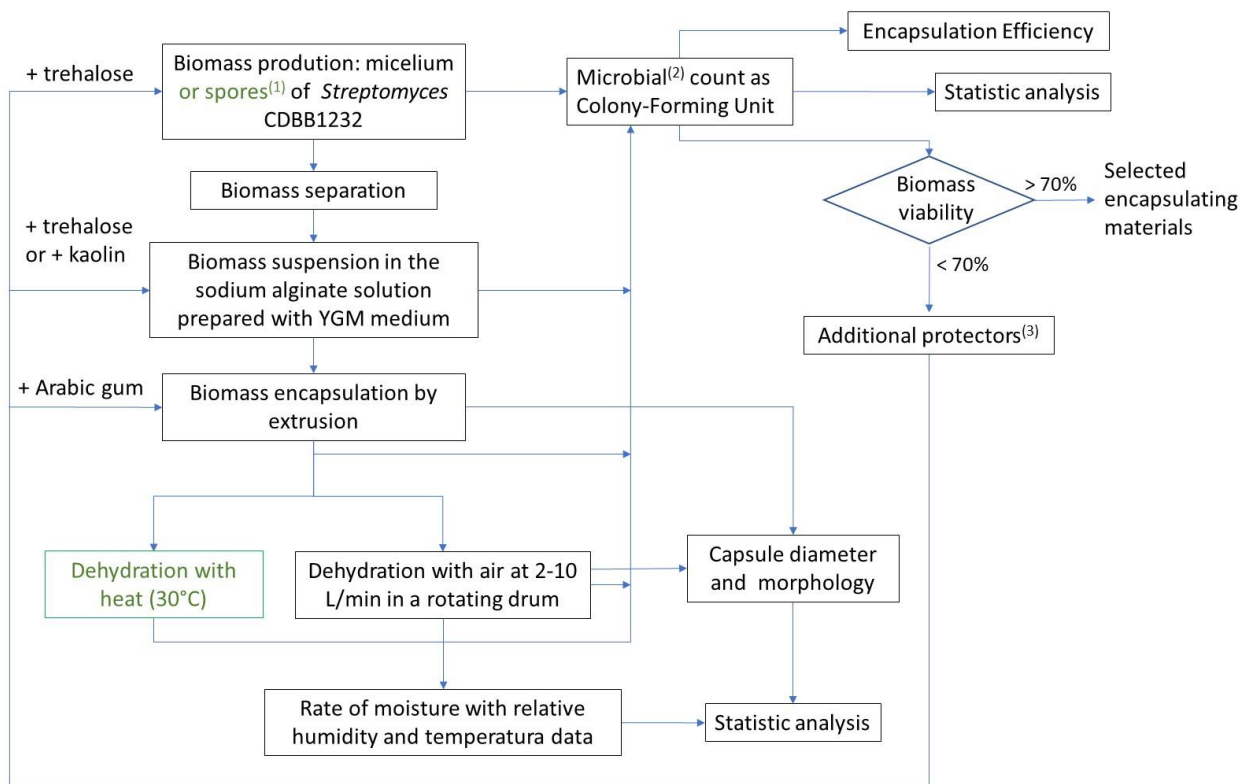

(1) Control experiments are identified in green.

(2) The spore count was determined in a Neubauer chamber.

(3) Biological material released from the alginate matrix and suspended in sterilized distilled water or 1% sodium citrate solution.

(4) Studies carried out with data reported in the literature

**Figure S1.** Experimental methodology
